# Supplementary material for: Synthesis and physicochemical properties of poly[2-(cyclohex-2-en-1-yl)aniline] as a new polyaniline derivative
Source: Royal Society of Chemistry journal article supplement (doi:10.1039/d1nj00596k), 2021-01-01
Supplement: d1nj00596k1.pdf [file d1nj00596k1.pdf]

## Supporting Information

### Synthesis and physicochemical properties of poly[2-(cyclohex-2-en-1-yl)aniline] as a new polyaniline derivative

Anastasia N. Andriianova,<sup>\*a,b</sup> Diana E. Gribko,<sup>b</sup> Ivan S. Petrov, Ilnur Mullagaliev, Alina F. Sattarova, Renat B. Salikhov, Akhat G. Mustafin<sup>a,b</sup>

<sup>a</sup> Ufa Institute of Chemistry of the Russian Academy of Sciences, Republic of Bashkortostan, pr. Oktyabrya 71, Ufa 450054, Russia. E-mail: an.chem17@gmail.com

<sup>b</sup> Bashkir State University, Republic of Bashkortostan, Z. Validi St 32, Ufa, 450076, Russia.

† Electronic supplementary information (ESI) available. See DOI:

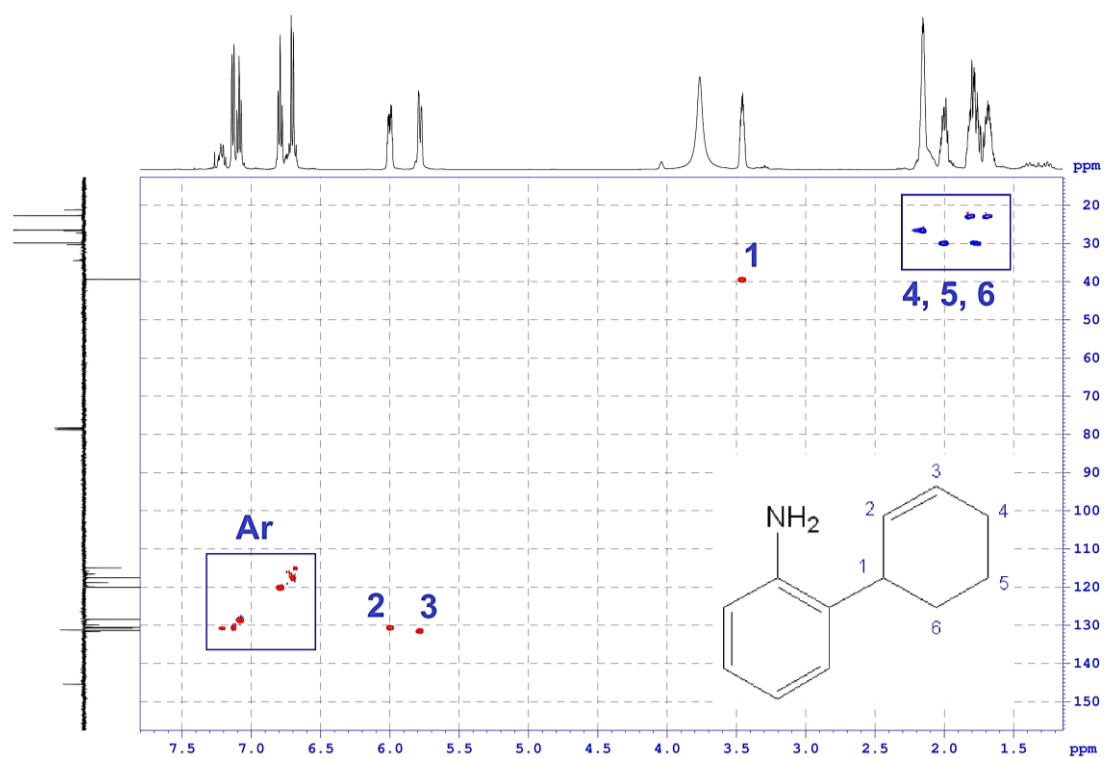

Figure S1. <sup>1</sup>H-<sup>13</sup>C HSQC spectra of (2-cyclohex-2-en-1-yl)aniline.

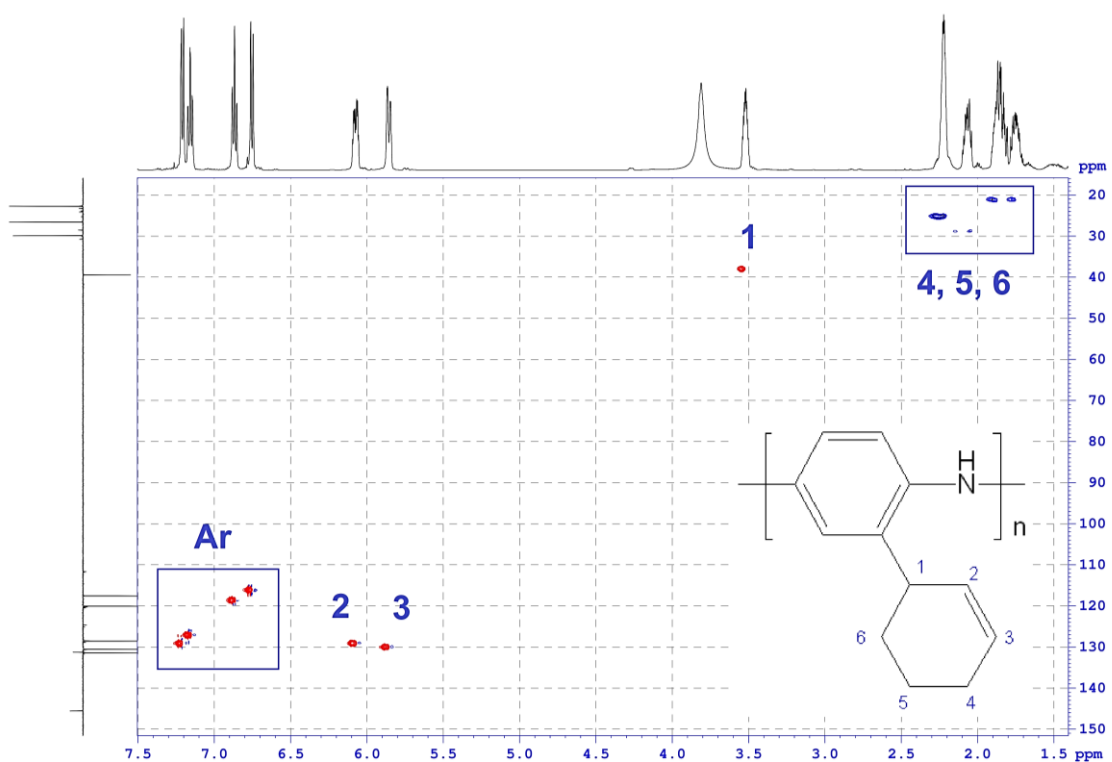

Figure S2.  $^1\text{H}$ - $^{13}\text{C}$  HSQC spectra of poly[(2-cyclohex-2-en-1-yl)aniline].

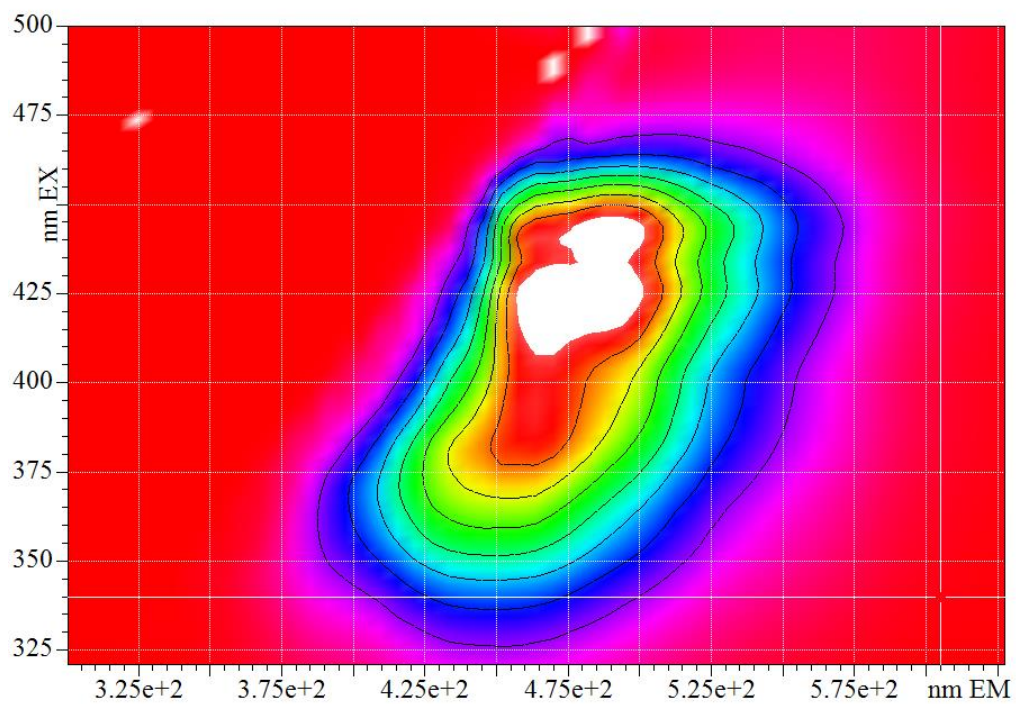

Figure S3. Photoluminescence excitation - emission map of C1.

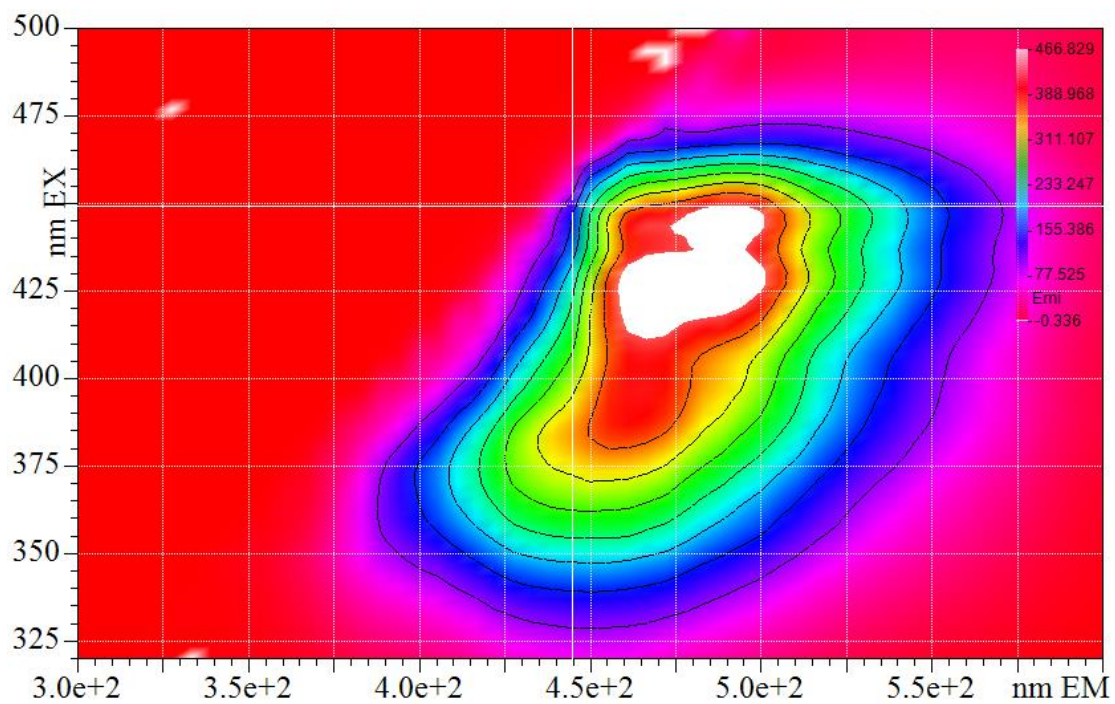

Figure S4. Photoluminescence excitation - emission map of C2.

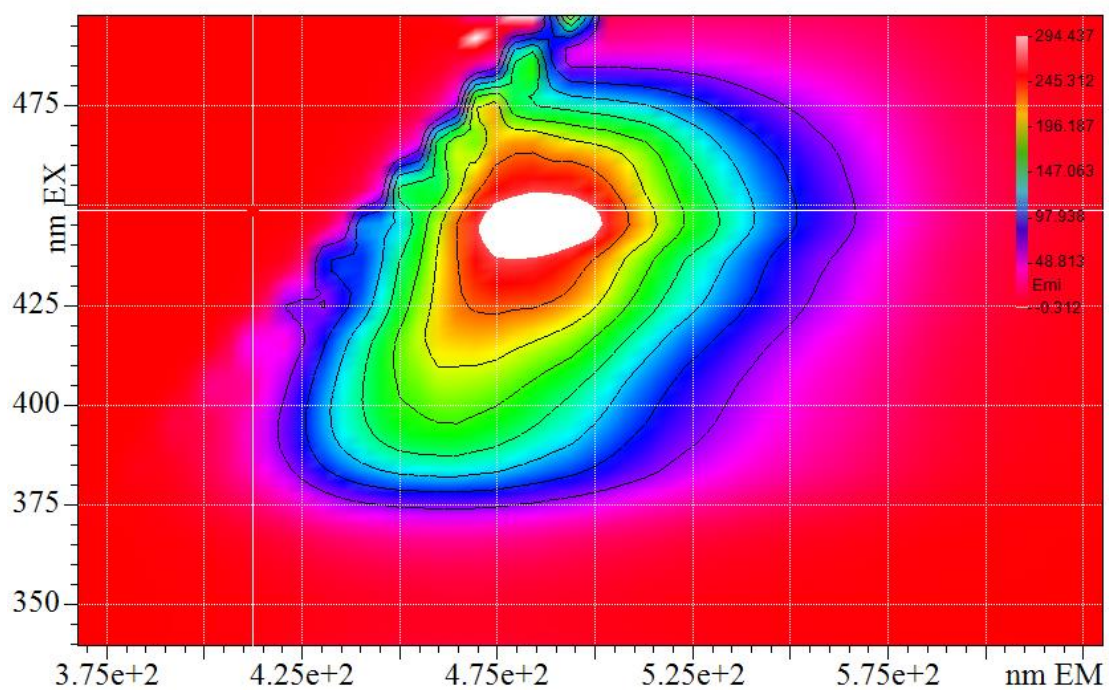

Figure S5. Photoluminescence excitation - emission map of C3.

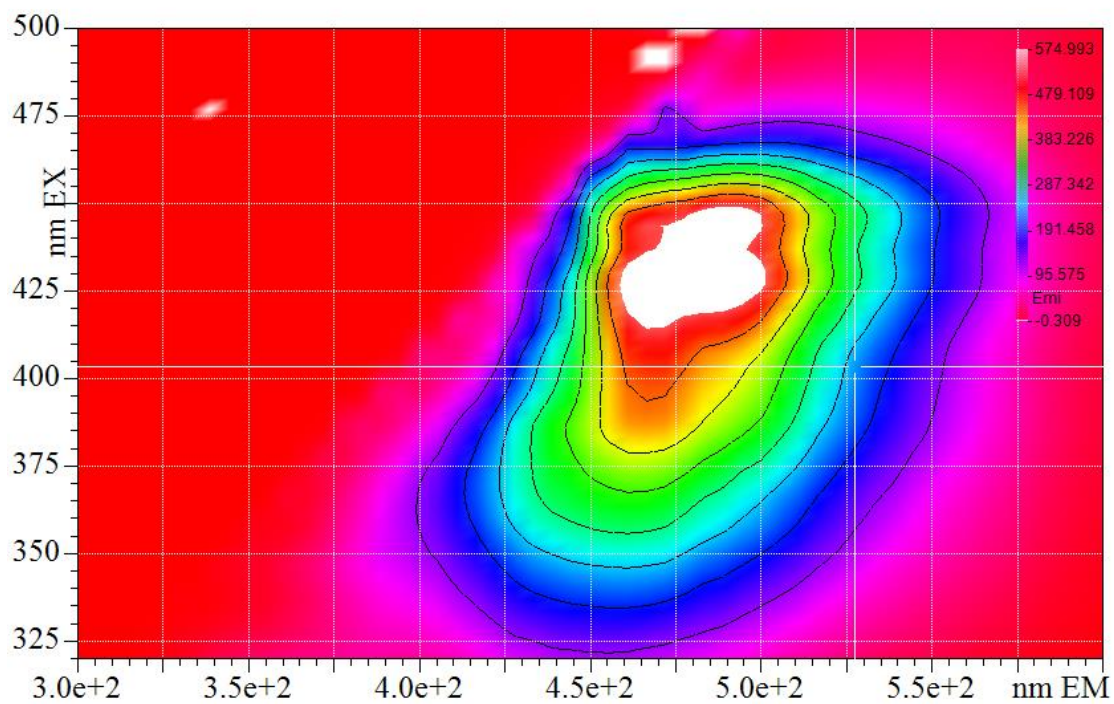

Figure S6. Photoluminescence excitation - emission map of C4.

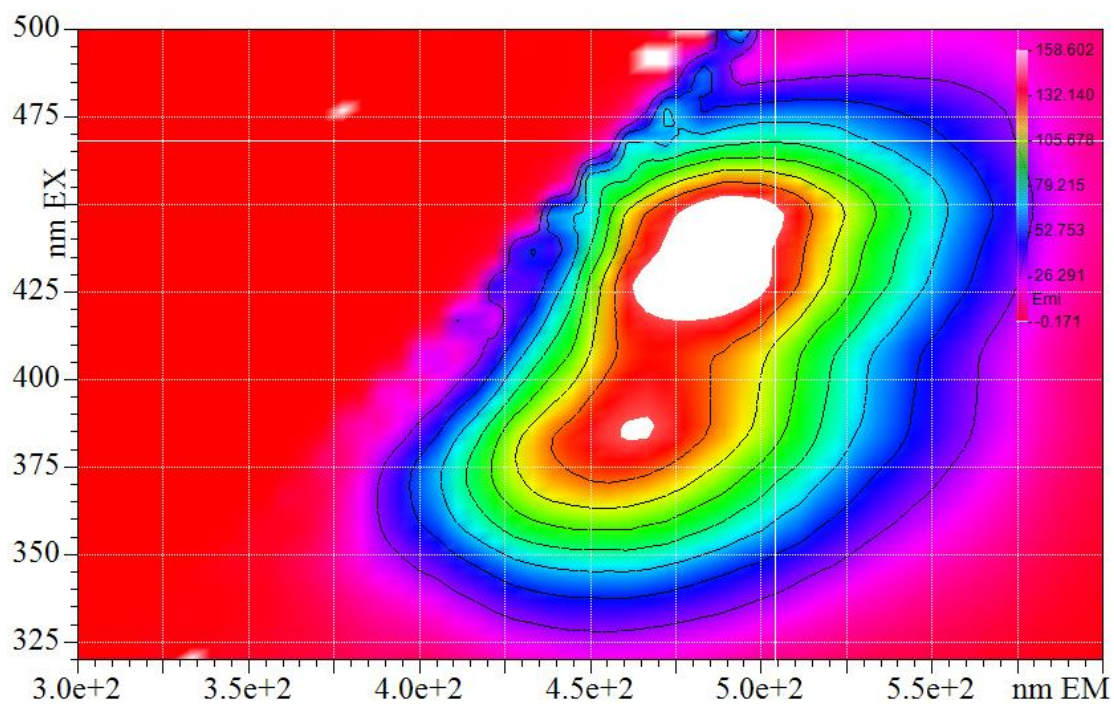

Figure S7. Photoluminescence excitation - emission map of C5.

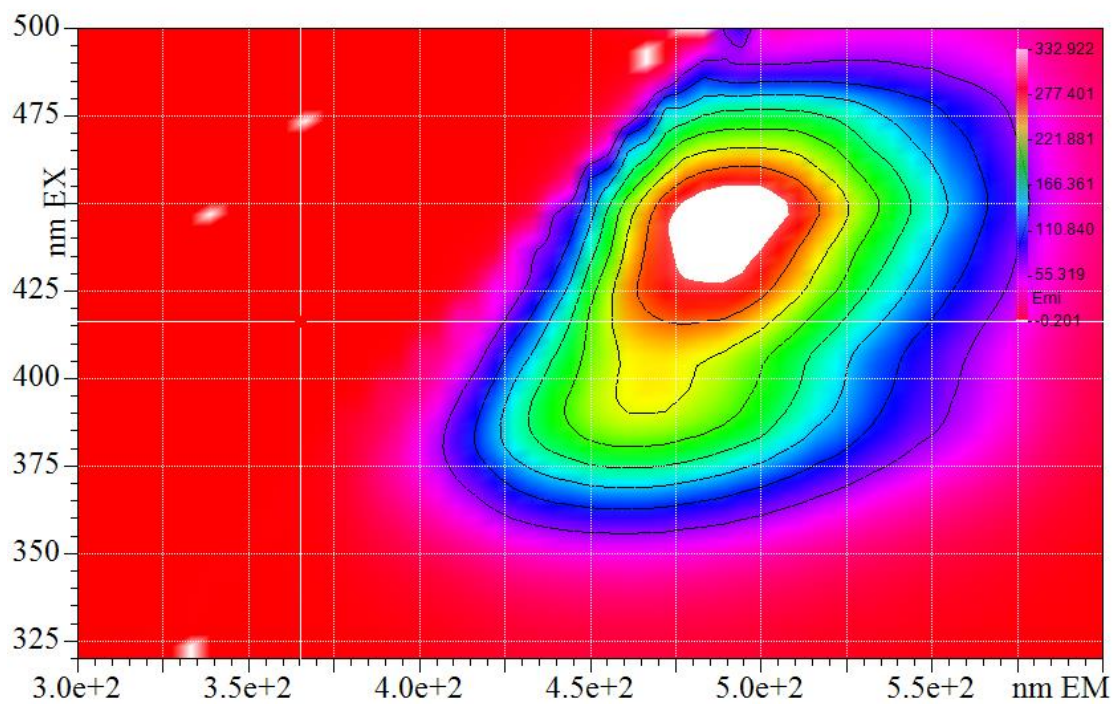

Figure S8. Photoluminescence excitation - emission map of C6.

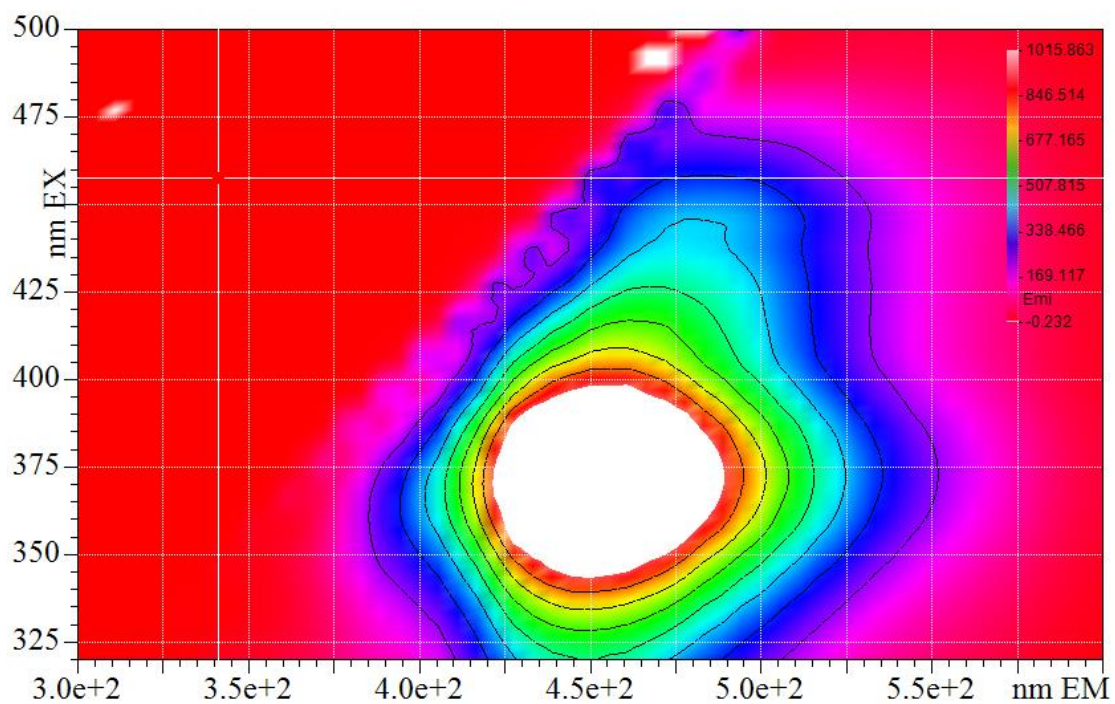

Figure S9. Photoluminescence excitation - emission map of C7.

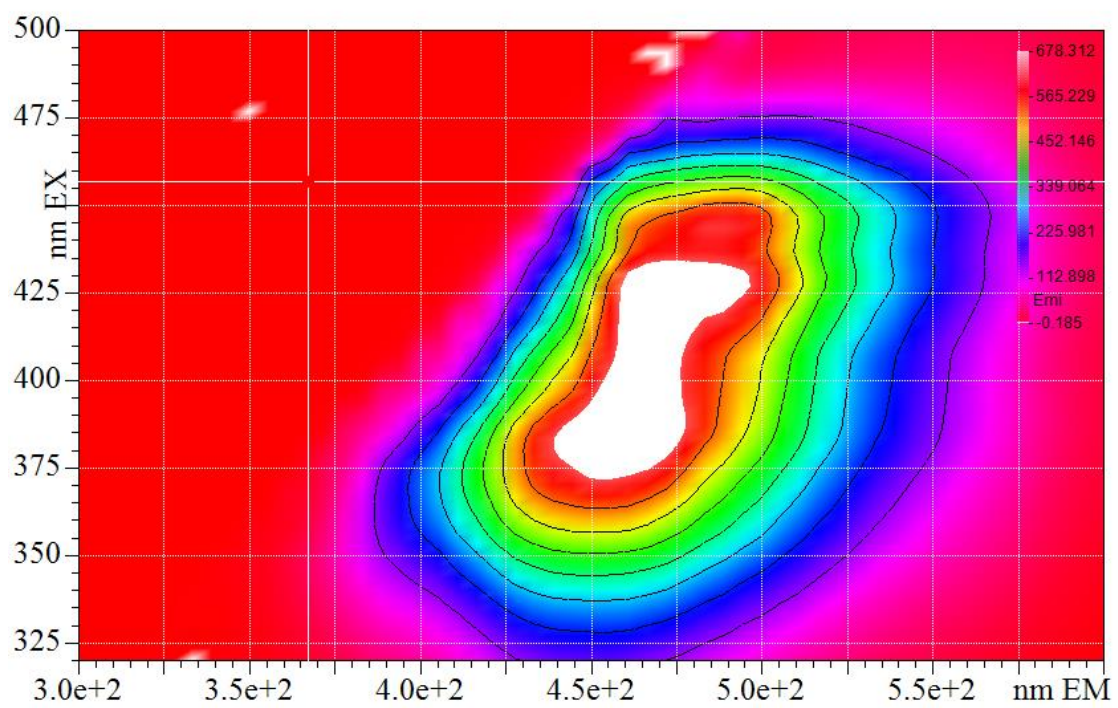

Figure S10. Photoluminescence excitation - emission map of C8.
